# Supplementary material for: Validating Cell Surface Proteases as Drug Targets for Cancer Therapy: What Do We Know, and Where Do We Go?
Source: MDPI journal article supplement (doi:10.3390/cancers14030624), 2022-01-26
Supplement: s1 [file s1]

**Table S1.** FAP-targeted diagnostic tracers for tumour imaging.

| Tracer                                                     | Disease Setting                                                                                                                                                                     | Phase | Study                                                    | Refs.   |
|------------------------------------------------------------|-------------------------------------------------------------------------------------------------------------------------------------------------------------------------------------|-------|----------------------------------------------------------|---------|
| <sup>68</sup> Ga-DOTA- FAP-2286                            | Solid tumours                                                                                                                                                                       | I     | NCT04621435<br>(Recruiting)                              |         |
|                                                            | Malignant Neoplasm                                                                                                                                                                  | NA    | NCT04554719<br>(Recruiting)                              | [1–3]   |
|                                                            | Malignant Neoplasm                                                                                                                                                                  | NA    | NCT05034146<br>(Recruiting)                              |         |
|                                                            | Solid tumours                                                                                                                                                                       | NA    | ChiCTR2100044131<br>(Recruiting)                         | [4–6]   |
| <sup>68</sup> Ga-DOTA-FAPI-04                              | Oral Carcinoma                                                                                                                                                                      | I     | NCT05003427<br>(Recruiting)                              |         |
|                                                            | Various types of cancer                                                                                                                                                             | I     | NCT04499365<br>(Recruiting)                              | [7]     |
|                                                            | Epithelial Ovarian Cancer                                                                                                                                                           | II    | NCT04504110<br>(Recruiting)                              |         |
|                                                            | Lymphoma                                                                                                                                                                            | NA    | ChiCTR2000032437;<br>NCT04367948<br>(Not yet recruiting) | [8]     |
|                                                            | Solid tumours                                                                                                                                                                       | NA    | ChiCTR2100045757<br>(Recruiting)                         | [9]     |
| Al[ <sup>18</sup> F]-NOTA-FAPI-04                          | Malignant solid tumours                                                                                                                                                             | NA    | ChiCTR2100051406<br>(Not yet recruiting)                 |         |
|                                                            | Tumours                                                                                                                                                                             | NA    | ChiCTR2100048334<br>(Recruiting)                         |         |
|                                                            | Lymphoma                                                                                                                                                                            | NA    | ChiCTR2000032437;<br>NCT04367948<br>(Not yet recruiting) | [8]     |
|                                                            | Solid tumours                                                                                                                                                                       | NA    | ChiCTR2000038080<br>(Recruiting)                         | [10]    |
| Al[ <sup>18</sup> F]-NOTA-FAPI-42                          | Solid tumours                                                                                                                                                                       | NA    | ChiCTR2100045757<br>(Recruiting)                         | [9]     |
| <sup>68</sup> Ga-DOTA- FAPI-46                             | (Metastatic) Sarcoma                                                                                                                                                                | I     | NCT04457258<br>(Recruiting)                              |         |
|                                                            | Breast, Colon, Esophageal, Gastric, Head and Neck, Lung, Kidney, Ovarian, Pancreatic, Renal and Uterus Cancer                                                                       | I     | NCT04147494<br>(Recruiting)                              | [11,12] |
|                                                            | Brain, Bladder, Urothelial, Testicular, Skin, Thyroid, Hepatocellular, Thymus, Pleural, Cervical, Adrenal and Hematologic cancer and Cholangio-carcinoma and Neuroendocrine tumours | I     | NCT04459273<br>(Recruiting)                              |         |
|                                                            | Prostate carcinoma                                                                                                                                                                  | I     | NCT04457232<br>(Recruiting)                              |         |
|                                                            | Different FAP <sup>+</sup> cancer types                                                                                                                                             | II    | 2021-000148-23<br>(Ongoing)                              |         |
| <sup>68</sup> Ga-DOTA-FAPI<br>(specific inhibitor unknown) | Oral Squamous Cell Carcinoma                                                                                                                                                        | NA    | NCT05030597;<br>ChiCTR2100050144<br>(Not yet recruiting) |         |

FAP-targeted diagnostic tracers for tumour imaging, based on small molecule FAP-inhibitors linked to a chelator-captured isotope. Clinical trial identifiers from Clinicaltrials.gov: NCTxxxxxxx; EU Clinical Trials Register: 20xx-00xxxx-xx; Chinese Clinical Trial Register: ChiCTR2x000xxxxx.

## References

1. Zhang, X.; Song, W.; Qin, C.; Liu, F.; Lan, X. Non-malignant findings of focal  $^{68}\text{Ga}$ -FAPI-04 uptake in pancreas. *Eur. J. Pediatr.* **2021**, *48*, 2635–2641, <https://doi.org/10.1007/s00259-021-05194-6>.
2. Qin, C.; Liu, F.; Huang, J.; Ruan, W.; Liu, Q.; Gai, Y.; Hu, F.; Jiang, D.; Hu, Y.; Yang, K.; et al. A head-to-head comparison of  $^{68}\text{Ga}$ -DOTA-FAPI-04 and  $^{18}\text{F}$ -FDG PET/MR in patients with nasopharyngeal carcinoma: a prospective study. *Eur. J. Pediatr.* **2021**, *48*, 3228–3237, <https://doi.org/10.1007/s00259-021-05255-w>.
3. Qin, C.; Song, Y.; Liu, X.; Gai, Y.; Liu, Q.; Ruan, W.; Liu, F.; Hu, F.; Lan, X. Increased uptake of  $^{68}\text{Ga}$ -DOTA-FAPI-04 in bones and joints: metastases and beyond. *Eur. J. Nucl. Med. Mol. Imaging* **2021**, 1–12, <https://doi.org/10.1007/s00259-021-05472-3>.
4. Liu, H.; Yang, X.; Liu, L.; Lei, L.; Chen, Y. Incidental Detection of Sinonasal Inverted Papilloma With  $^{68}\text{Ga}$ -FAPI PET/CT in a Patient With Esophageal Cancer. *Clinical Nuclear Medicine* **2021**, *46*, 845–846.
5. Yang, X.; Liu, H.; You, Z.; Gong, W.; Chen, Y. Increased  $^{68}\text{Ga}$ -FAPI Uptake in Intramuscular Gluteal Hematoma in a Patient With Hemophagocytic Syndrome. *Clin. Nucl. Med.* **2021**, *46*, 1022–1023, <https://doi.org/10.1097/rnu.0000000000003771>.
6. Lan, L.; Liu, H.; Wang, Y.; Deng, J.; Peng, D.; Feng, Y.; Wang, L.; Chen, Y.; Qiu, L. The potential utility of [ $^{68}\text{Ga}$ ]Ga-DOTA-FAPI-04 as a novel broad-spectrum oncological and non-oncological imaging agent—comparison with [ $^{18}\text{F}$ ]FDG. *Eur. J. Nucl. Med. Mol. Imaging* **2021**, 1–17, <https://doi.org/10.1007/s00259-021-05522-w>.
7. Zheng, S.; Lin, R.; Chen, S.; Zheng, J.; Lin, Z.; Zhang, Y.; Xue, Q.; Chen, Y.; Zhang, J.; Lin, K.; et al. Characterization of the benign lesions with increased  $^{68}\text{Ga}$ -FAPI-04 uptake in PET/CT. *Ann. Nucl. Med.* **2021**, *35*, 1312–1320, <https://doi.org/10.1007/s12149-021-01673-w>.
8. Wang, G.; Jin, X.; Zhu, H.; Wang, S.; Ding, J.; Zhang, Y.; Yang, Z.; Wang, X.  $^{68}\text{Ga}$ -NOTA-FAPI-04 PET/CT in a patient with primary gastric diffuse large B cell lymphoma: comparisons with [ $^{18}\text{F}$ ] FDG PET/CT. *Eur. J. Nucl. Med. Mol. Imaging* **2021**, *48*, 647–8.
9. Hu, K.; Wang, L.; Wu, H.; Huang, S.; Tian, Y.; Wang, Q.; Xiao, C.; Han, Y.; Tang, G. [ $^{18}\text{F}$ ]FAPI-42 PET imaging in cancer patients: optimal acquisition time, biodistribution, and comparison with [ $^{68}\text{Ga}$ ]Ga-FAPI-04. *Eur. J. Nucl. Med. Mol. Imaging* **2021**, <https://doi.org/10.1007/s00259-021-05646-z>.
10. Wang, S.; Zhou, X.; Xu, X.; Ding, J.; Liu, S.; Hou, X.; Li, N.; Zhu, H.; Yang, Z. Clinical translational evaluation of Al $^{18}\text{F}$ -NOTA-FAPI for fibroblast activation protein-targeted tumour imaging. *Eur. J. Nucl. Med. Mol. Imaging* **2021**, *48*, 4259–4271.
11. Sonni, I.; Lee-Felker, S.; Memarzadeh, S.; Quinn, M.M.; Mona, C.E.; Luekerath, K.; Czernin, J.; Calais, J.  $^{68}\text{Ga}$ -FAPI-46 diffuse bilateral breast uptake in a patient with cervical cancer after hormonal stimulation. *Eur. J. Nucl. Med. Mol. Imaging* **2021**, *48*, 924–926, <https://doi.org/10.1007/s00259-020-04947-z>.
12. Mona, C.; Benz, M.; Hikmat, F.; Grogan, T.; Luekerath, K.; Razmaria, A.A.; Riahi, R.; Slavik, R.; Grigis, M.; Carlucci, G.; et al. Validation of FAPI PET biodistribution by immunohistochemistry in patients with solid cancers: A prospective exploratory study. *J. Clin. Oncol.* **2021**, *39*, 15, 3066.
